# Supplementary material
Source: publisher figshare collection journal article supplement (https://acs.figshare.com/ndownloader/files/3746332)
Supplement: Supplementary file 1 [file 3746332]

# Efficient and Substantial DNA Lesions From Near 0 eV Electron-Induced Decay of the O<sub>4</sub>-Hydrogenated Thymine Nucleotides: A DFT Study

Shoushan Wang, Changzhe Zhang, Peiwen Zhao, Yuxiang Bu<sup>1</sup>

*School of Chemistry and Chemical Engineering, Institute of Theoretical Chemistry, Shandong University, Jinan, 250100, P. R. China*

## Supporting Information

The calculated structures, molecular orbitals, and spin density distributions of relevant molecules including initial reactants, transition state and products in the gas phase and aqueous phase.

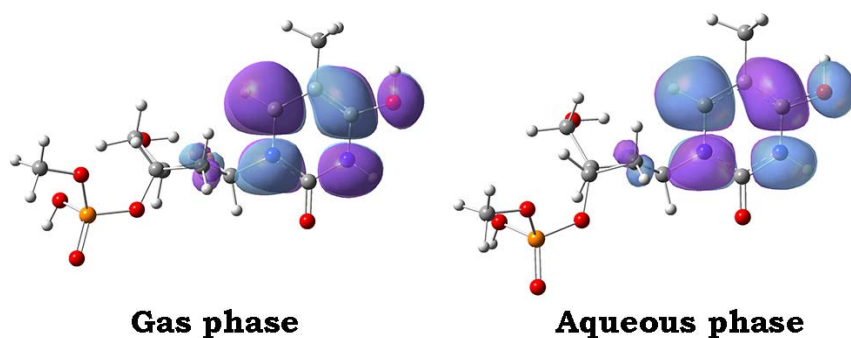

**Figure S1.** The HOMOs of 3'-dT(O4H)MPH in the gas phase and aqueous phase, respectively.

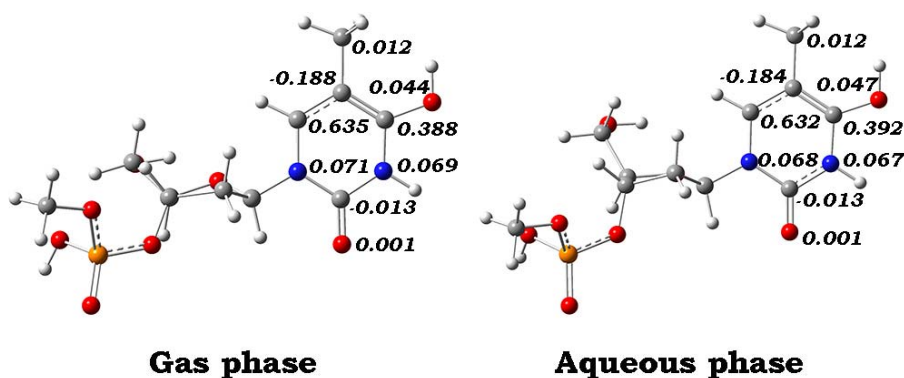

**Figure S2.** The spin density distributions on the base moiety of 3'-dT(O4H)MPH in the gas phase and aqueous phase, respectively.

<sup>\*</sup> The corresponding author: Yuxiang Bu, e-mail: byx@sdu.edu.cn

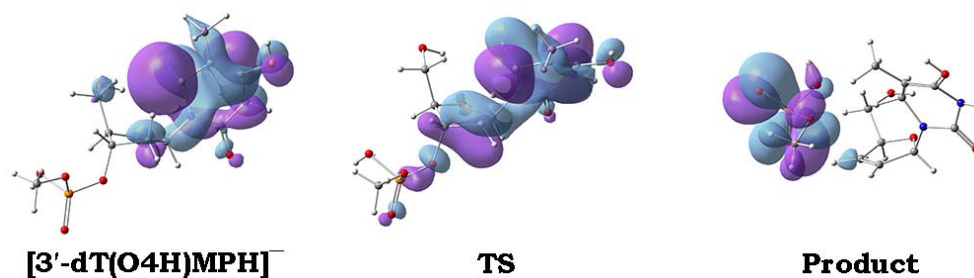

**Figure S3.** The HOMOs of relevant stationary points along the C<sub>3'</sub>-O<sub>3'</sub> bond rupture pathway in the gas phase 3'-dT(O4H)MPH induced by EE attachment.

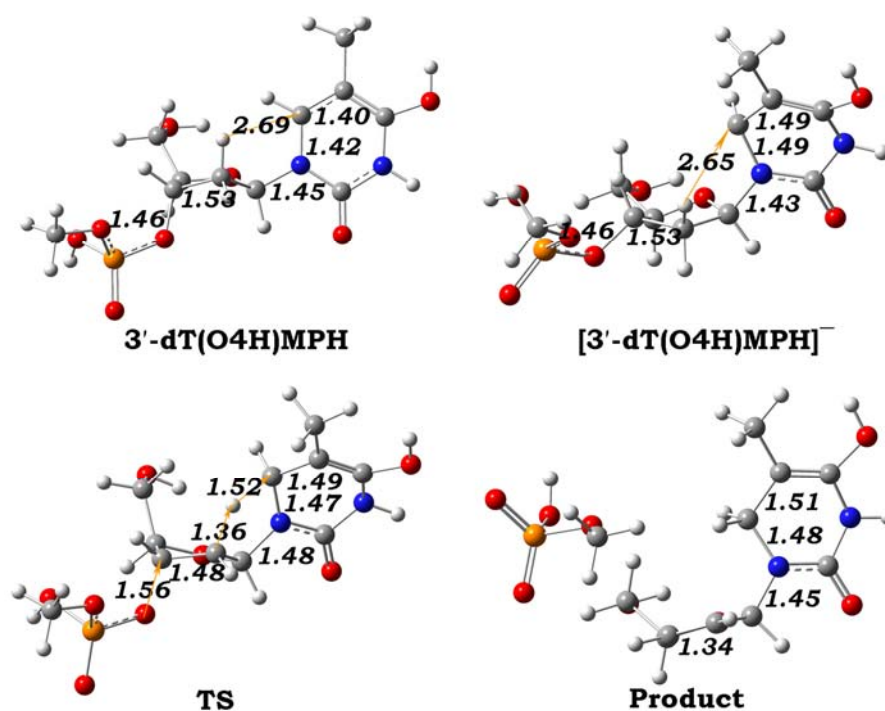

**Figure S4.** Optimized structures and selected geometrical parameters for stationary points along the C<sub>3'</sub>-O<sub>3'</sub> bond rupture pathway in the aqueous phase 3'-dT(O4H)MPH induced by EE attachment. Distances are all in the unit of Å.

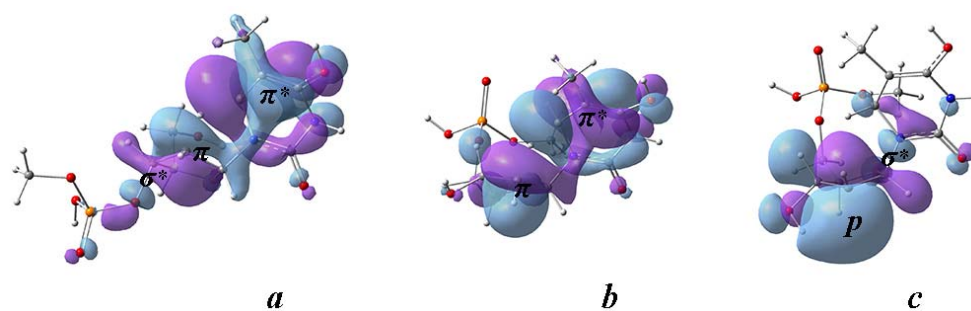

**Figure S5.** (a) The HOMO of the TS state along the aqueous phase C<sub>3'</sub>-O<sub>3'</sub> bond rupture pathway in 3'-dT(O4H)MPH induced by EE attachment. (b) The HOMO of the TS1 state along the aqueous phase N<sub>1</sub>-C<sub>1'</sub> bond rupture pathway in 5'-dT(O4H)MPH induced by EE attachment. (c) The HOMO of [5'-dT(O4H,C6H)MPH]<sup>-</sup> intermediate along the aqueous phase N<sub>1</sub>-C<sub>1'</sub> bond rupture pathway in 5'-dT(O4H)MPH induced by EE attachment.

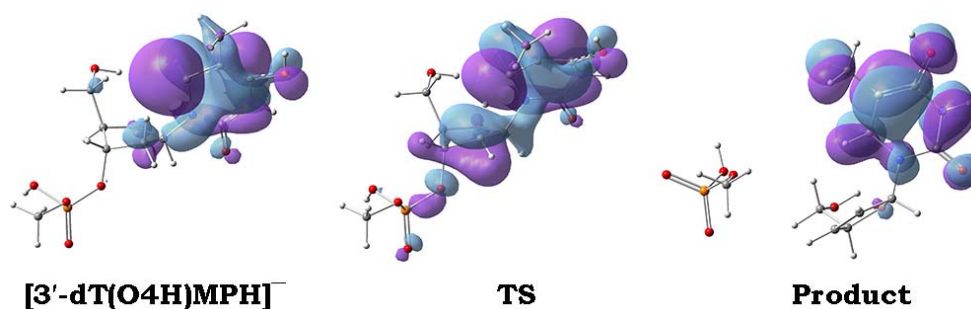

**Figure S6.** The HOMOs of relevant stationary points along the C<sub>3'</sub>-O<sub>3'</sub> bond rupture pathway in the aqueous phase 3'-dT(O4H)MPH induced by EE attachment.

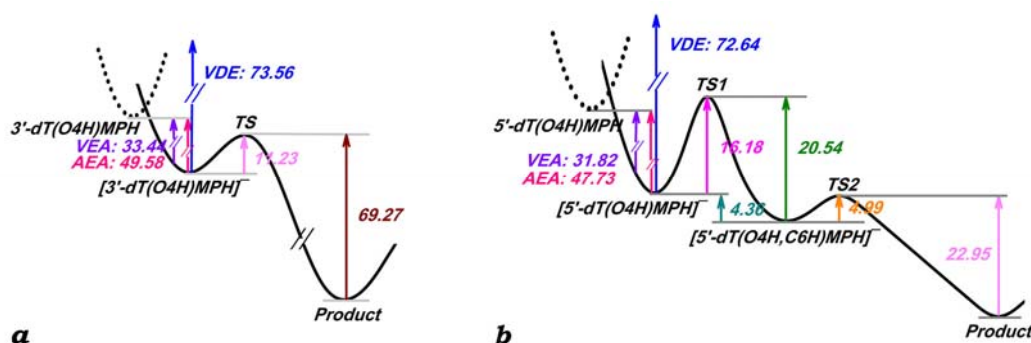

**Figure S7.** (a) The potential energy surface along the C<sub>3'</sub>-O<sub>3'</sub> bond rupture pathway in the aqueous phase 3'-dT(O4H)MPH induced by EE attachment. (b) The potential energy surface along the N<sub>1</sub>-C<sub>1'</sub> bond cleavage pathway in the aqueous phase 5'-dT(O4H)MPH induced by EE attachment. Energies are all in the unit of kcal/mol.

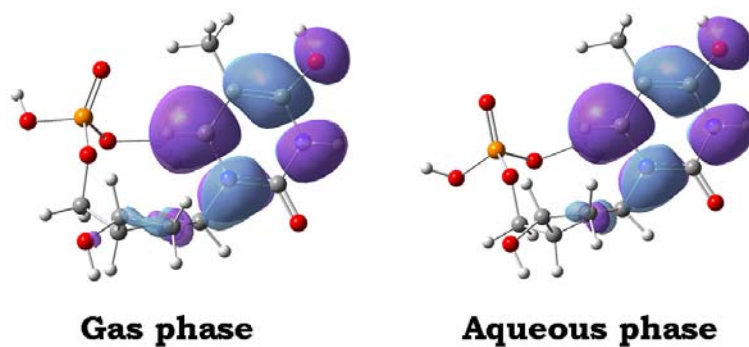

**Figure S8.** The HOMOs of 5'-dT(O4H)MPH in the gas phase and aqueous phase, respectively.

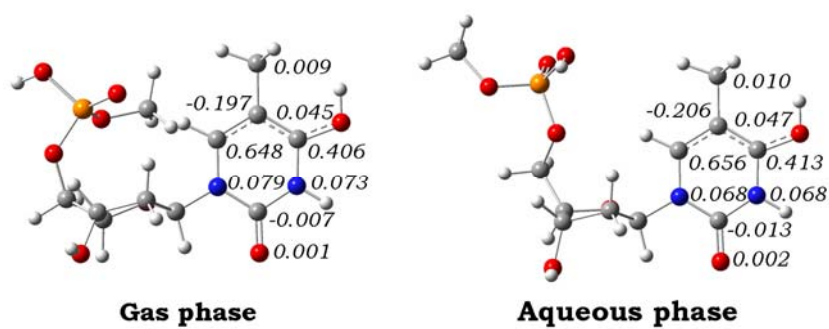

**Figure S9.** The spin density distributions on the base moiety of 5'-dT(O4H)MPH in the gas phase and aqueous phase, respectively.

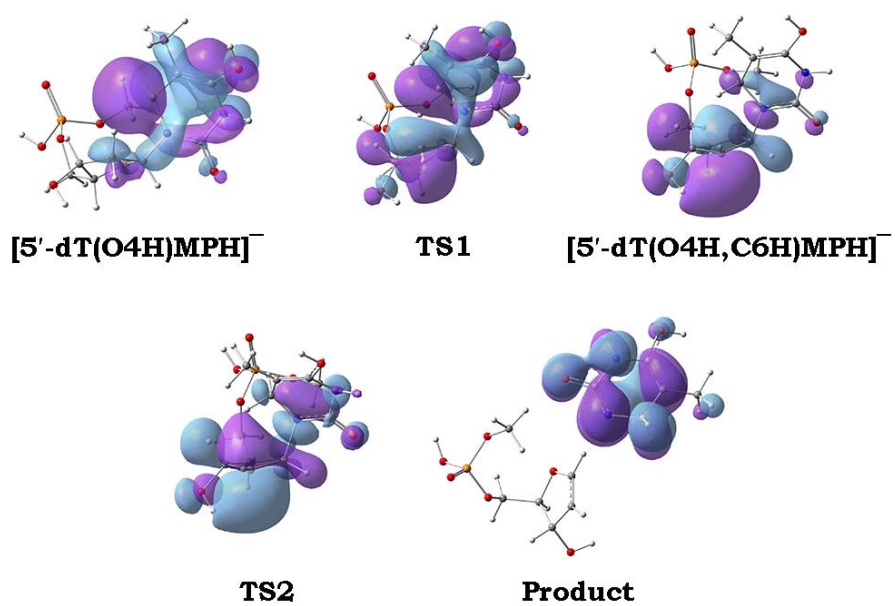

**Figure S10.** The HOMOs of relevant stationary points along the N<sub>1</sub>-C<sub>1'</sub> bond cleavage pathway in the gas phase 5'-dT(O4H)MPH induced by EE attachment.

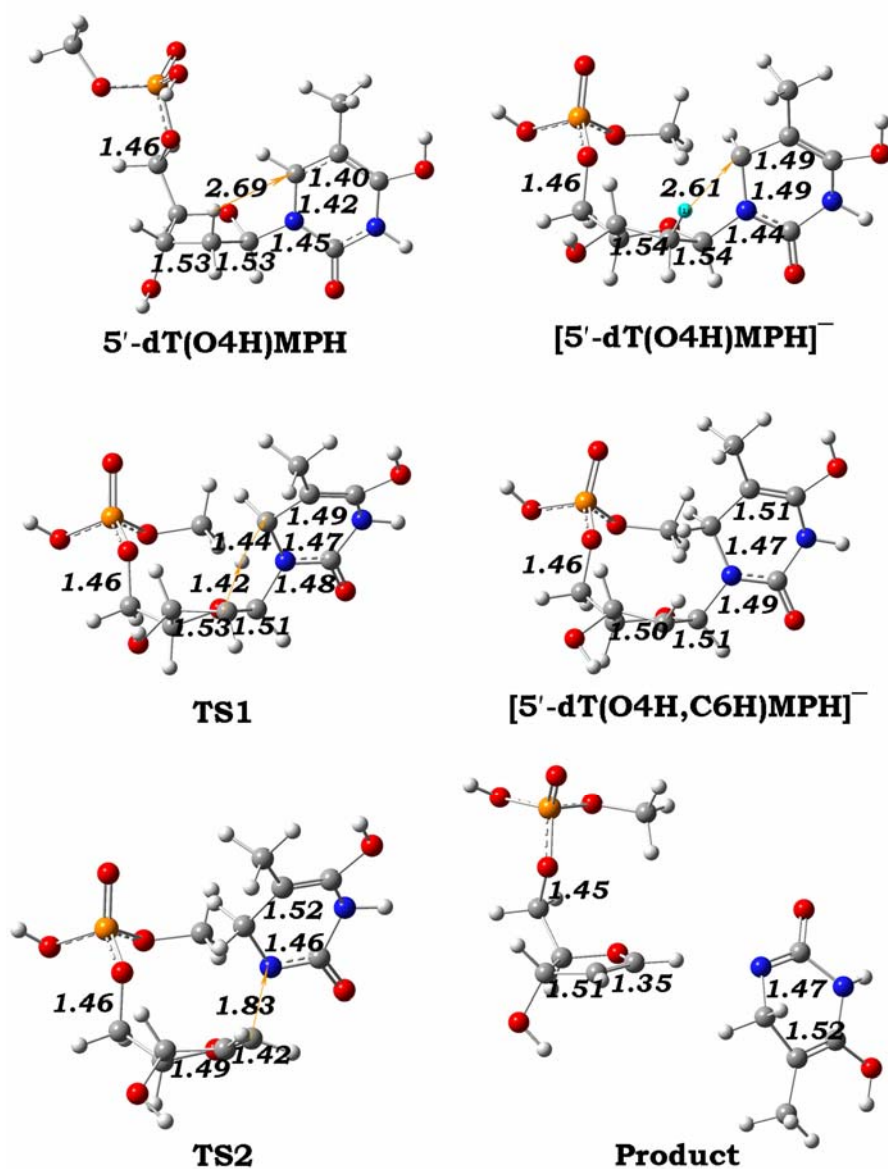

**Figure S11.** Optimized structures and selected geometrical parameters for stationary points along the  $N_1-C_{1'}$  bond cleavage pathway in the aqueous phase 5'-dT(O4H)MPH induced by EE attachment. Distances are all in the unit of Å.

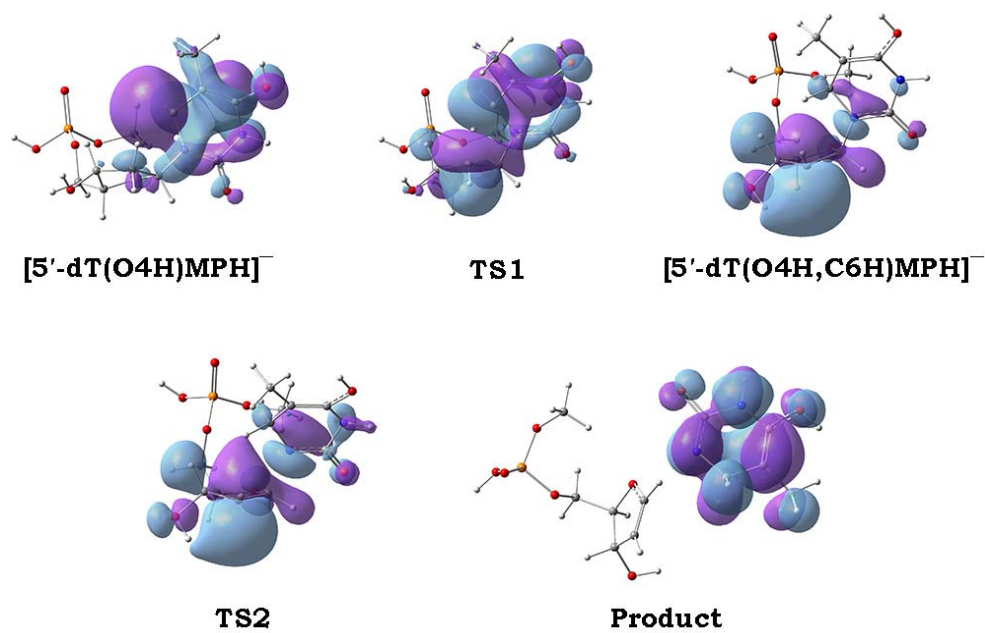

**Figure S12.** The HOMOs of relevant stationary points along the N<sub>1</sub>-C<sub>1'</sub> bond cleavage pathway in the aqueous phase 5'-dT(O4H)MPH induced by EE attachment.
